# Supplementary material
Source: PubMed Central journal article supplement (PMC7373817)
Supplement: NIHMS1609529-supplement-SI.pdf [file NIHMS1609529-supplement-SI.pdf]

# **An *in silico* mechanistic insight into HDAC8 activation facilitates the discovery of new small-molecule activators**

**Jintong Du**<sup>2,3</sup>, **Wen Li**<sup>1</sup>, **Bo Liu**<sup>3</sup>, **Yingkai Zhang**<sup>4,5</sup>, **Jinming Yu**<sup>2,3</sup>, **Xuben Hou**<sup>1,4,\*</sup> and **Hao Fang**<sup>1,\*</sup>

<sup>1</sup> Department of Medicinal Chemistry and Key Laboratory of Chemical Biology of Natural Products (MOE), School of Pharmacy, Shandong University, Jinan, Shandong, 250012, China;

<sup>2</sup> Shandong Cancer Hospital, Shandong University, Jinan, Shandong, 250012, China;

<sup>3</sup> Shandong Cancer Hospital and Institute, Shandong First Medical University and Shandong Academy of Medical Sciences, Jinan, Shandong, 250117, China;

<sup>4</sup> Department of Chemistry, New York University, New York, New York 10003, United States;

<sup>5</sup> NYU-ECNU Center for Computational Chemistry, New York University-Shanghai, Shanghai 200122, China;

Corresponding authors: [hxb@sdu.edu.cn](mailto:hxb@sdu.edu.cn) (X.H.); [haofangcn@sdu.edu.cn](mailto:haofangcn@sdu.edu.cn) (H.F.).

## **Supporting Information**

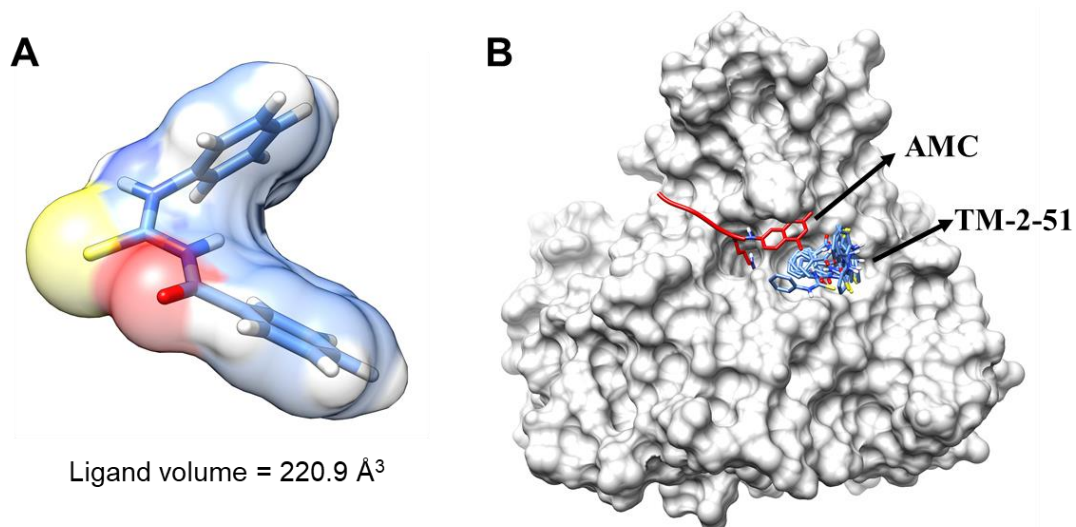

**Fig. S1.** (A) Calculated ligand volume of known HDAC8 activator **TM-2-51**. (B) Molecular docking results of **TM-2-51**. Briefly, **TM-2-51** was docked in the HDAC8-substrate crystal structure (PDB: 2V5W) using AutoDock Vina with the searching volume include the whole protein structure. Top 10 scored structure of **TM-2-51** were shown as stick models (colored in cornflower blue). The fluorescent substrate was presented as red ribbon with 7-Amino-4-methylcoumarin (AMC) group shown as red sticks.

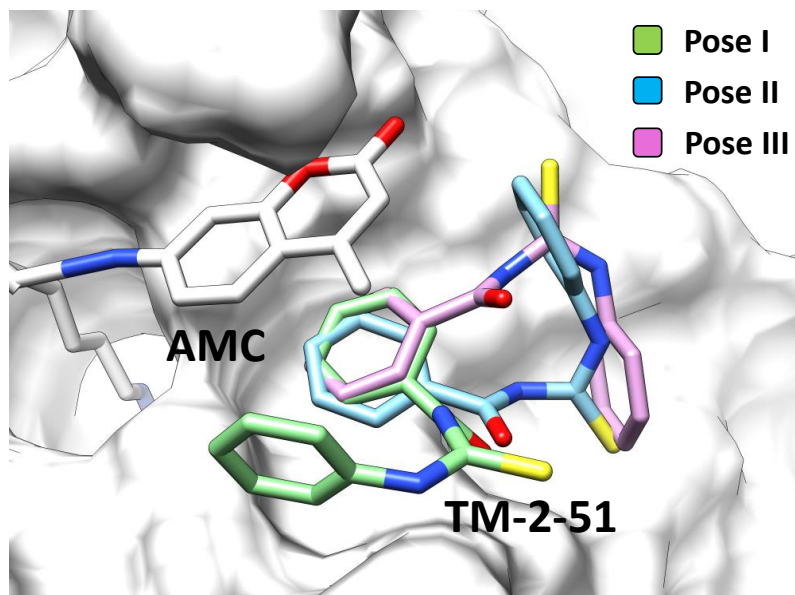

**Fig. S2.** Three representative top-scored docking poses of **TM-2-51**.

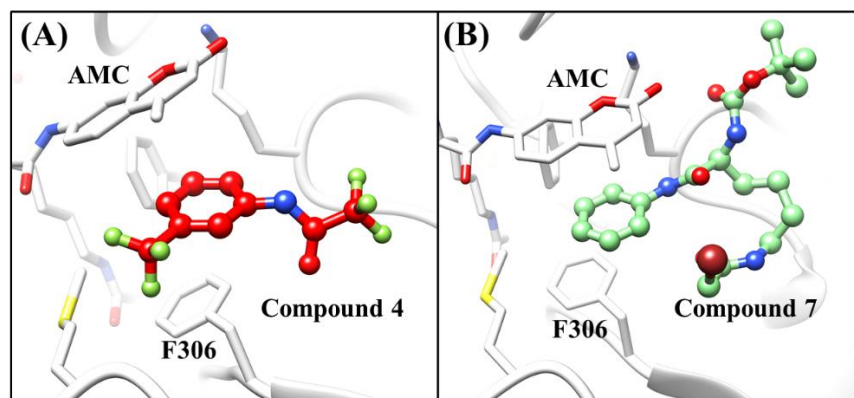

**Fig. S3.** Predicted binding mode of known HDAC8 activators compound **4** (A) and compound **7** (B) with HDAC8-fluorescent substrate complex.

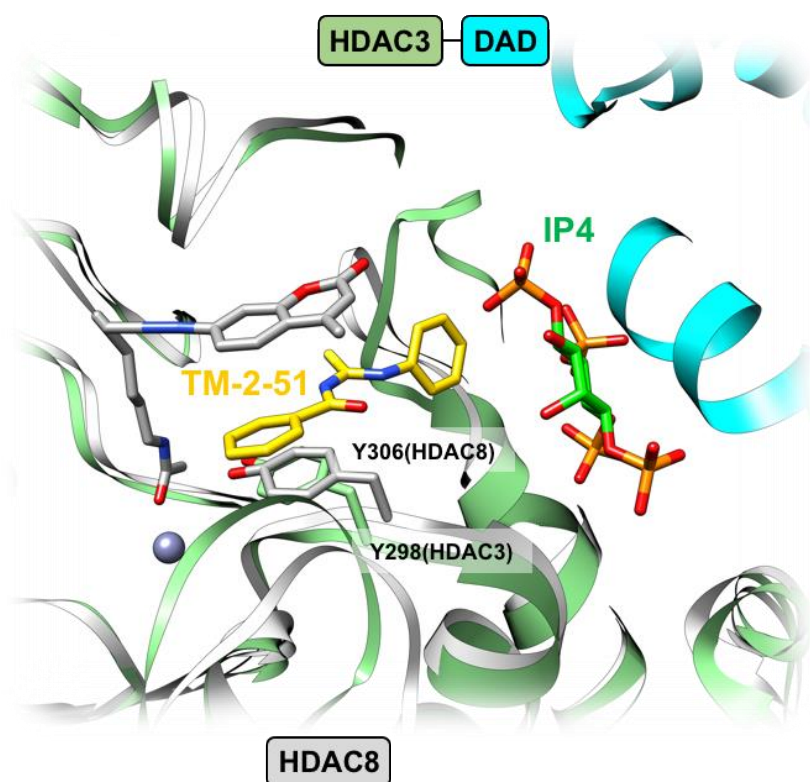

**Fig. S4.** Comparison of HDAC3-DAD-IP4 complex (PDB: 4A69) and HDAC8-p53AMC-activator complex (Representative snapshot from MD simulation).

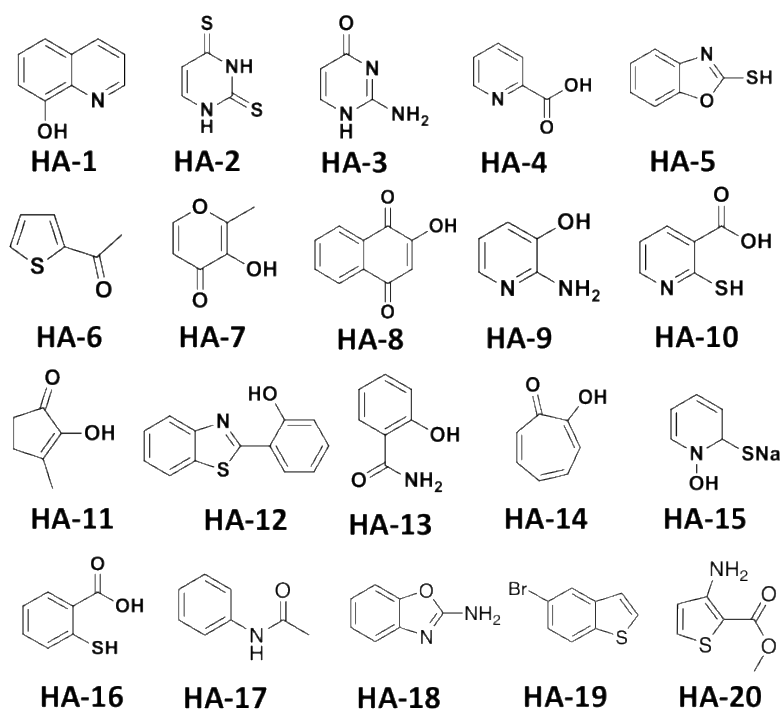

**Fig. S5.** Twenty low-molecular weight fragments from virtual screening.
